# Supplementary material for: Mesoporous MnO2/SBA-15 as a synergetic adsorbent for enhanced uranium adsorption
Source: Royal Society of Chemistry journal article supplement (doi:10.1039/d0nj02966a), 2020-01-01
Supplement: d0nj02966a1.pdf [file d0nj02966a1.pdf]

## Mesoporous MnO<sub>2</sub>/SBA-15 as a synergetic adsorbent for enhanced uranium adsorption

Yi Ding\*, Qiang Xian, Enchao Wang, Xinmiao He, Zhengdi Jiang, Hui Dan\*, Wenkun Zhu\*

*Key Subject Laboratory of National Defense for Radioactive Waste and Environmental Security,*

*Southwest University of Science and Technology, Mianyang 621010, PR China*

### Experimental details

#### *The standard curve*

The absorbance of arsenazo-III with different concentration of UO<sub>2</sub><sup>2+</sup> were measured at wavelength of 651 nm which attributed to the U-arsenazo III complex. The standard curve was obtained by the absorbance as a function of U concentration, and a linear equation with high correlation coefficient ( $R^2 = 0.99967$ ) was fitted as shown in Fig. S1.

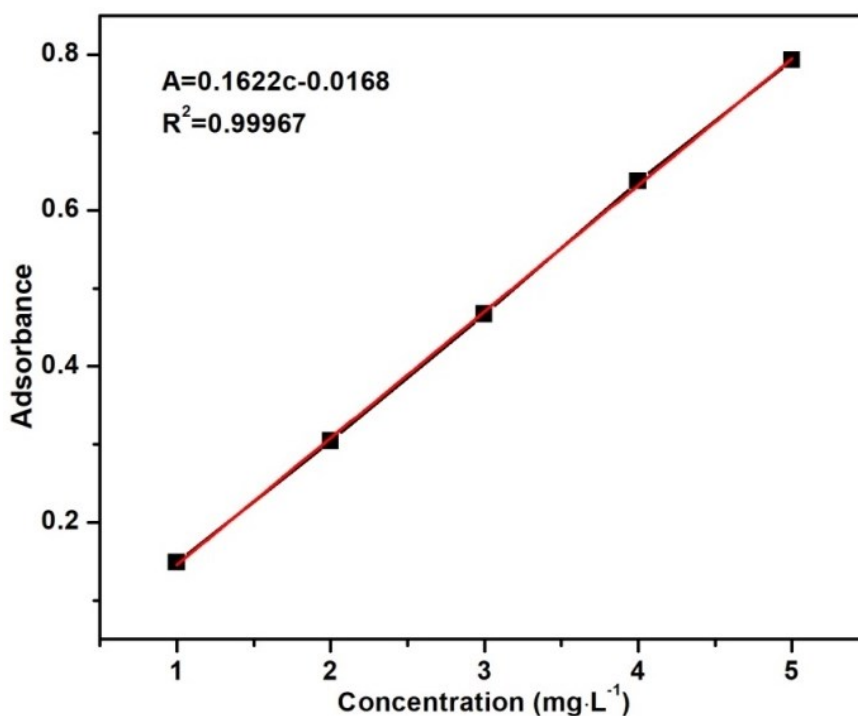

Fig. S1 The standard curve of the concentration of U.

\* Corresponding author. Tel./fax: +86 8166089889.  
E-mail address: dingyi2279@126.com (Y. Ding)
